# Supplementary material for: Samarium-doped cobalt metal–organic framework as a versatile catalyst for the conversion of furfural and 2-methylfuran to high-value-added biofuel precursors
Source: Royal Society of Chemistry journal article supplement (doi:10.1039/d4se00671b), 2024-01-01
Supplement: d4se00671b1.pdf [file d4se00671b1.pdf]

## Supporting Information

### Samarium Doped Cobalt Metal-Organic Framework as a Versatile Catalyst for the Conversion of Furfural and 2-Methyl Furan to High-Value Added Biofuel Precursor

Sahil Sharma<sup>a</sup>, Jyoti Rohilla<sup>b</sup>, Sahil Thakur<sup>a,b</sup>, Raghubir Singh<sup>a\*</sup>, Varinder Kaur<sup>b\*</sup>

<sup>a</sup>Department of Chemistry, DAV College, Sector 10, Chandigarh-160011, India

<sup>b</sup>Department of Chemistry, Panjab University, Sector 14, Chandigarh-160014, India

\*Corresponding author: [raghubirsingh@davchd.ac.in](mailto:raghubirsingh@davchd.ac.in) (R.S.), [var\\_ka04@yahoo.co.in](mailto:var_ka04@yahoo.co.in) (V.K.),

| List of Figures   |                                                                                                                                                                                                                          |            |
|-------------------|--------------------------------------------------------------------------------------------------------------------------------------------------------------------------------------------------------------------------|------------|
| <b>Figure S1</b>  | <sup>1</sup> H NMR Spectra of 5,5'-(furan-2-ylmethylene)bis(2-methylfuran)                                                                                                                                               | <b>S2</b>  |
| <b>Figure S2</b>  | <sup>13</sup> C NMR Spectra of 5,5'-(furan-2-ylmethylene)bis(2-methylfuran).                                                                                                                                             | <b>S3</b>  |
| <b>Figure S3</b>  | DTG Curve of Co-TTA MOF and Sm/Co-TTA MOF.                                                                                                                                                                               | <b>S4</b>  |
| <b>Figure S4</b>  | EDAX of Co-TTA and Sm/Co-TTA MOF                                                                                                                                                                                         | <b>S4</b>  |
| <b>Figure S5</b>  | XPS of (a) O 1s of Co-TTA MOF , (b) C 1s of Co-TTA MOF , (c) O 1s of SM/Co-TTA MOF, (d) C 1s of Sm/Co-TTA MOF.                                                                                                           | <b>S5</b>  |
| <b>Figure S6</b>  | NH <sub>3</sub> -TPD Profiles of (a) Co-TTA MOF , (b) Sm/Co-TTA MOF.                                                                                                                                                     | <b>S6</b>  |
| <b>Figure S7</b>  | GC Chromatogram of (a) FMBMF , (b) Furfural , (c) 2 MF                                                                                                                                                                   | <b>S7</b>  |
| <b>Figure S8</b>  | (a) Kinetic curve of formation of FMBMF by different amounts of catalyst. (b) The kinetic curve of FMBMF formation at different temperature rates. (c) The kinetic curve of FMBMF formation at different time intervals. | <b>S8</b>  |
| <b>Figure S9</b>  | Proposed mechanism of catalytic conversion of FAL and 2-MF to FMBMF.                                                                                                                                                     | <b>S8</b>  |
| <b>Figure S10</b> | FTIR Spectra of Fresh Sm/Co-TTA MOF and after 5 th catalytic cycle.                                                                                                                                                      | <b>S9</b>  |
| List of Tables    |                                                                                                                                                                                                                          |            |
| <b>Table S1</b>   | Crystal data and structure refinement for Co-TTA MOF.                                                                                                                                                                    | <b>S9</b>  |
| <b>Table S2</b>   | Selected Bond length(A°) and bond angle for Co-TTA MOF.                                                                                                                                                                  | <b>S10</b> |
| <b>Table S3</b>   | Optimization Reactions for Co-TTA MOF.                                                                                                                                                                                   | <b>S11</b> |

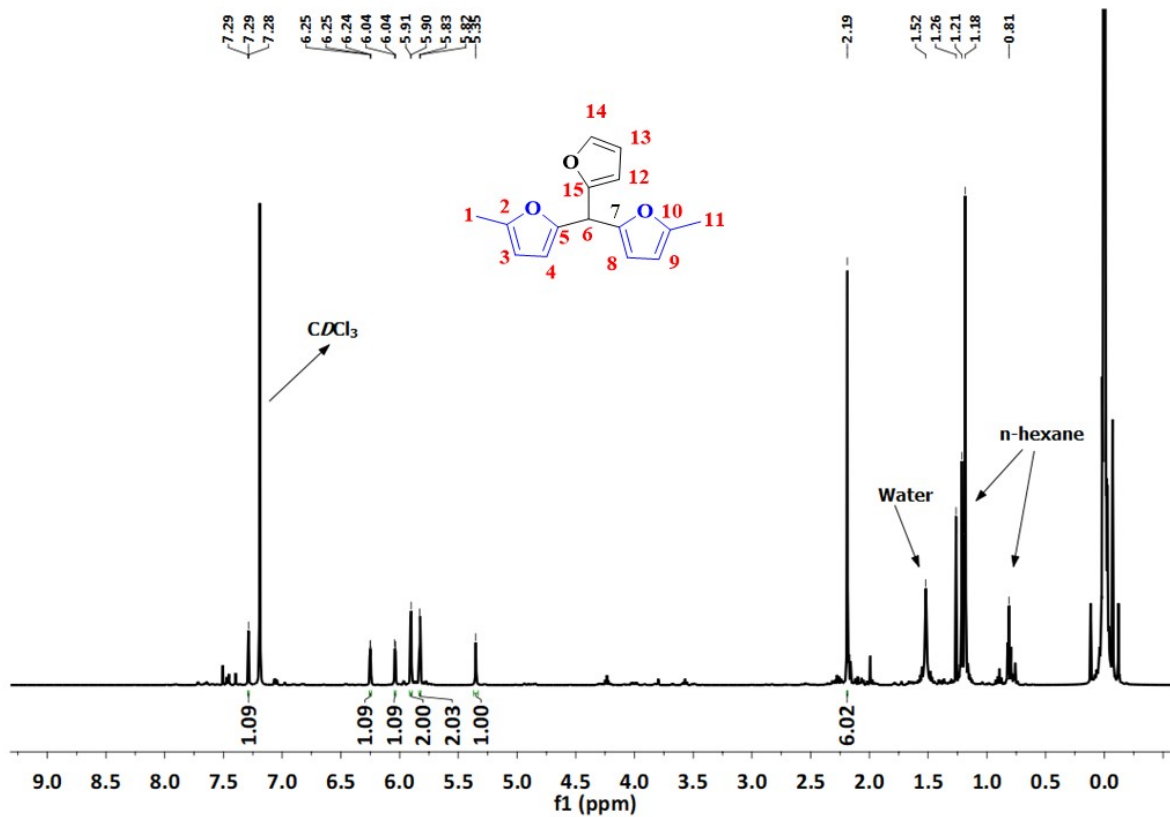

<sup>1</sup>H NMR (CDCl<sub>3</sub>, 500 MHz): 2.19 (s, 6H, H<sup>1</sup> H<sup>11</sup>), 5.35 (s, 1H, H<sup>6</sup>), 5.82 (d, 2H, H<sup>4</sup> H<sup>8</sup>), 5.91 (d, 2H, H<sup>3</sup> H<sup>9</sup>), 6.04 (d, 2H, H<sup>12</sup>), 6.24-6.25 (m, 1H, H<sup>13</sup>), 7.28 (d, 1H, H<sup>14</sup>)

**Figure S1.** <sup>1</sup>H NMR Spectrum of 5,5'-(furan-2-ylmethylene)bis(2-methylfuran).

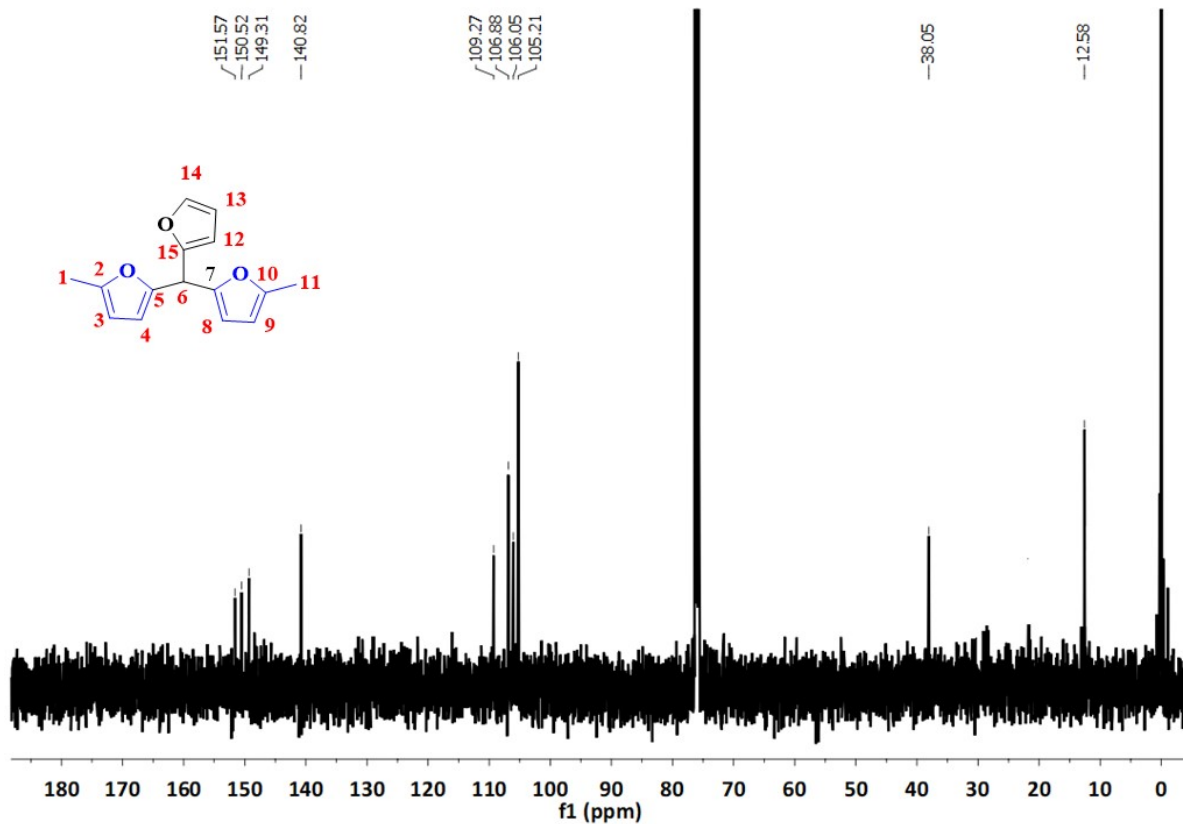

$^{13}\text{C}$  NMR ( $\text{CDCl}_3$ , 125 MHz): 12.58 (C<sup>1</sup>, C<sup>11</sup>), 38.05(C<sup>6</sup>), 105.21(C<sup>3</sup>, C<sup>9</sup>), 106.059(C<sup>12</sup>), 107.88(C<sup>4</sup>, C<sup>8</sup>), 109.27(C<sup>13</sup>), 140.82 (C<sup>14</sup>), 149.31(C<sup>2</sup>, C<sup>10</sup>), 150.52(C<sup>5</sup>, C<sup>7</sup>), 151.57(C<sup>15</sup>)

**Figure S2.**  $^{13}\text{C}$  NMR Spectrum of 5,5'-(furan-2-ylmethylene)bis(2-methylfuran).

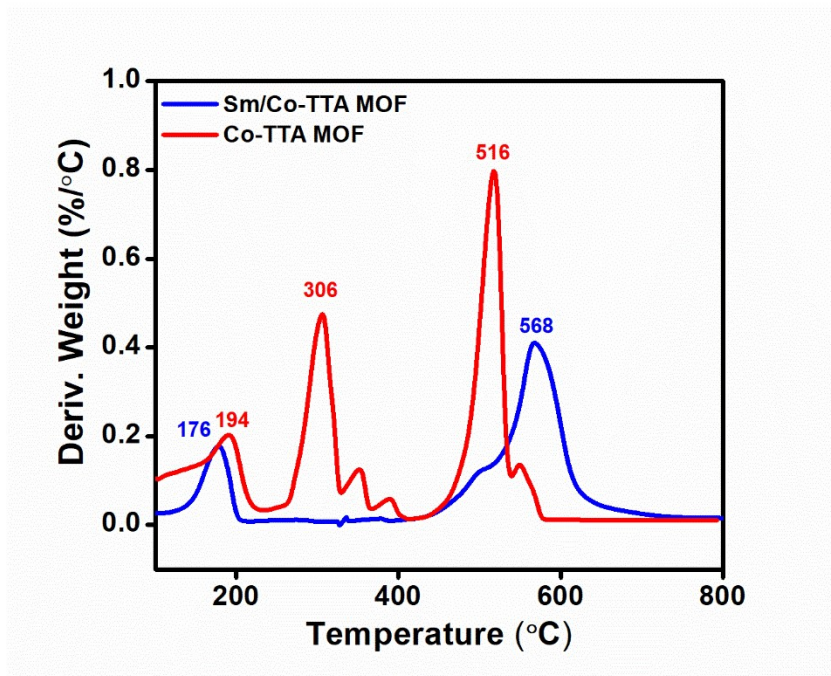

**Figure S3.** DTG Curve of Co-TTA MOF and Sm/Co-TTA MOF.

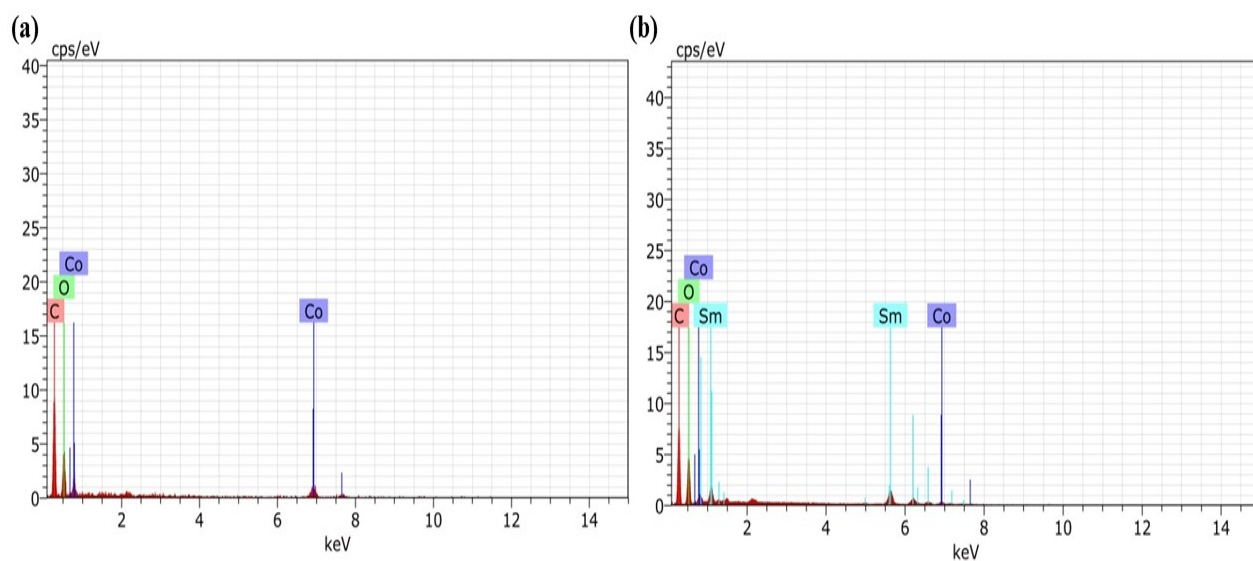

**Figure S4.** EDAX of Co-TTA and Sm/Co-TTA MOF.

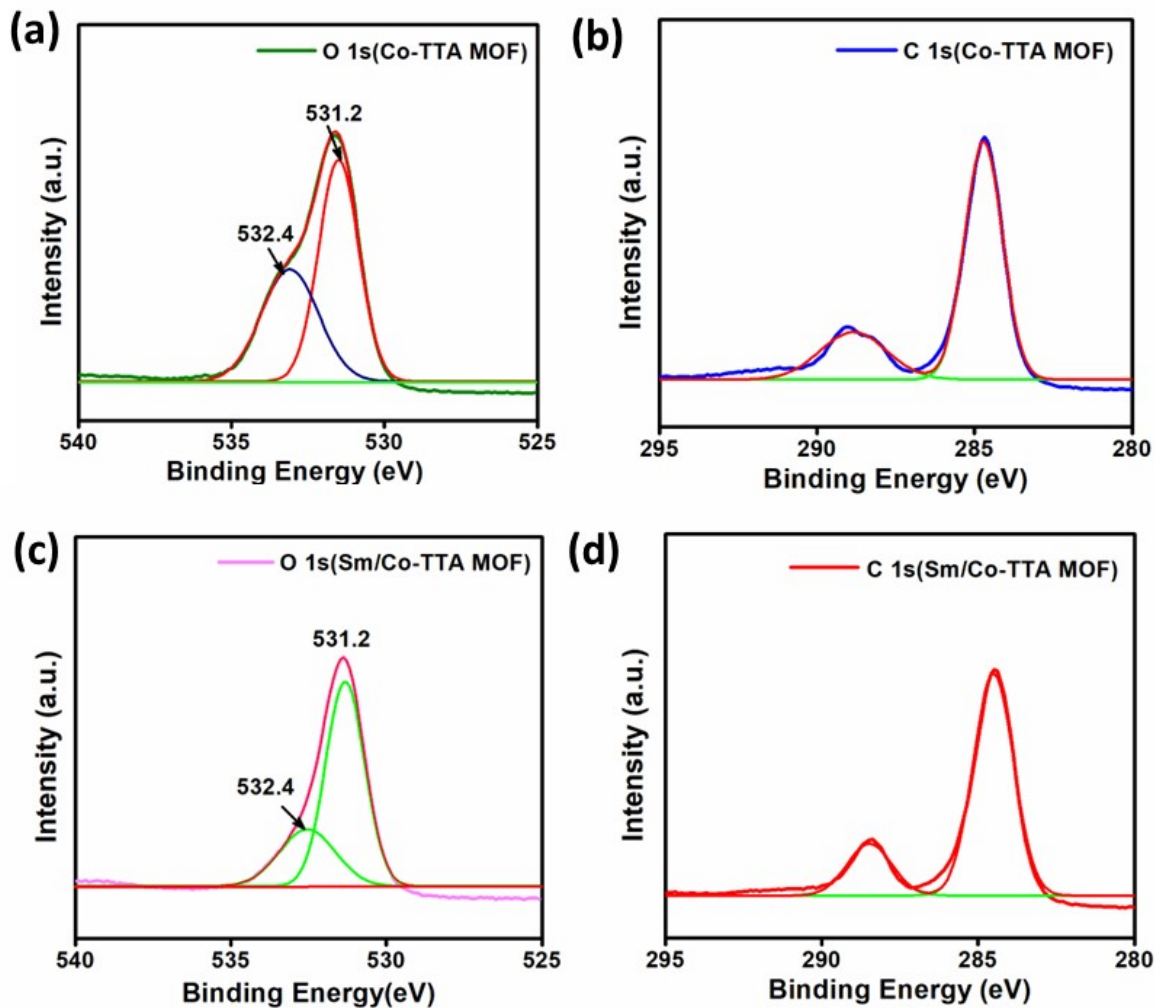

**Figure S5.** XPS of (a) O 1s of Co-TTA MOF , (b) C 1s of Co-TTA MOF , (c) O 1s of SM/Co-TTA MOF, (d) C 1s of Sm/Co-TTA MOF.

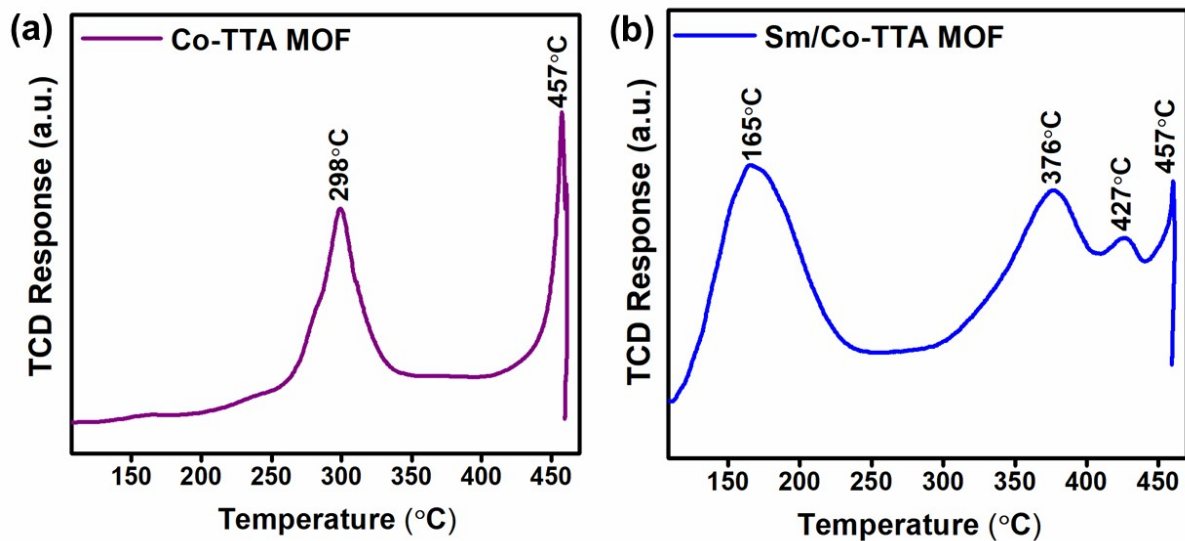

**Figure S6.** NH<sub>3</sub>-TPD Profiles of (a) Co-TTA MOF , (b) Sm/Co-TTA MOF.

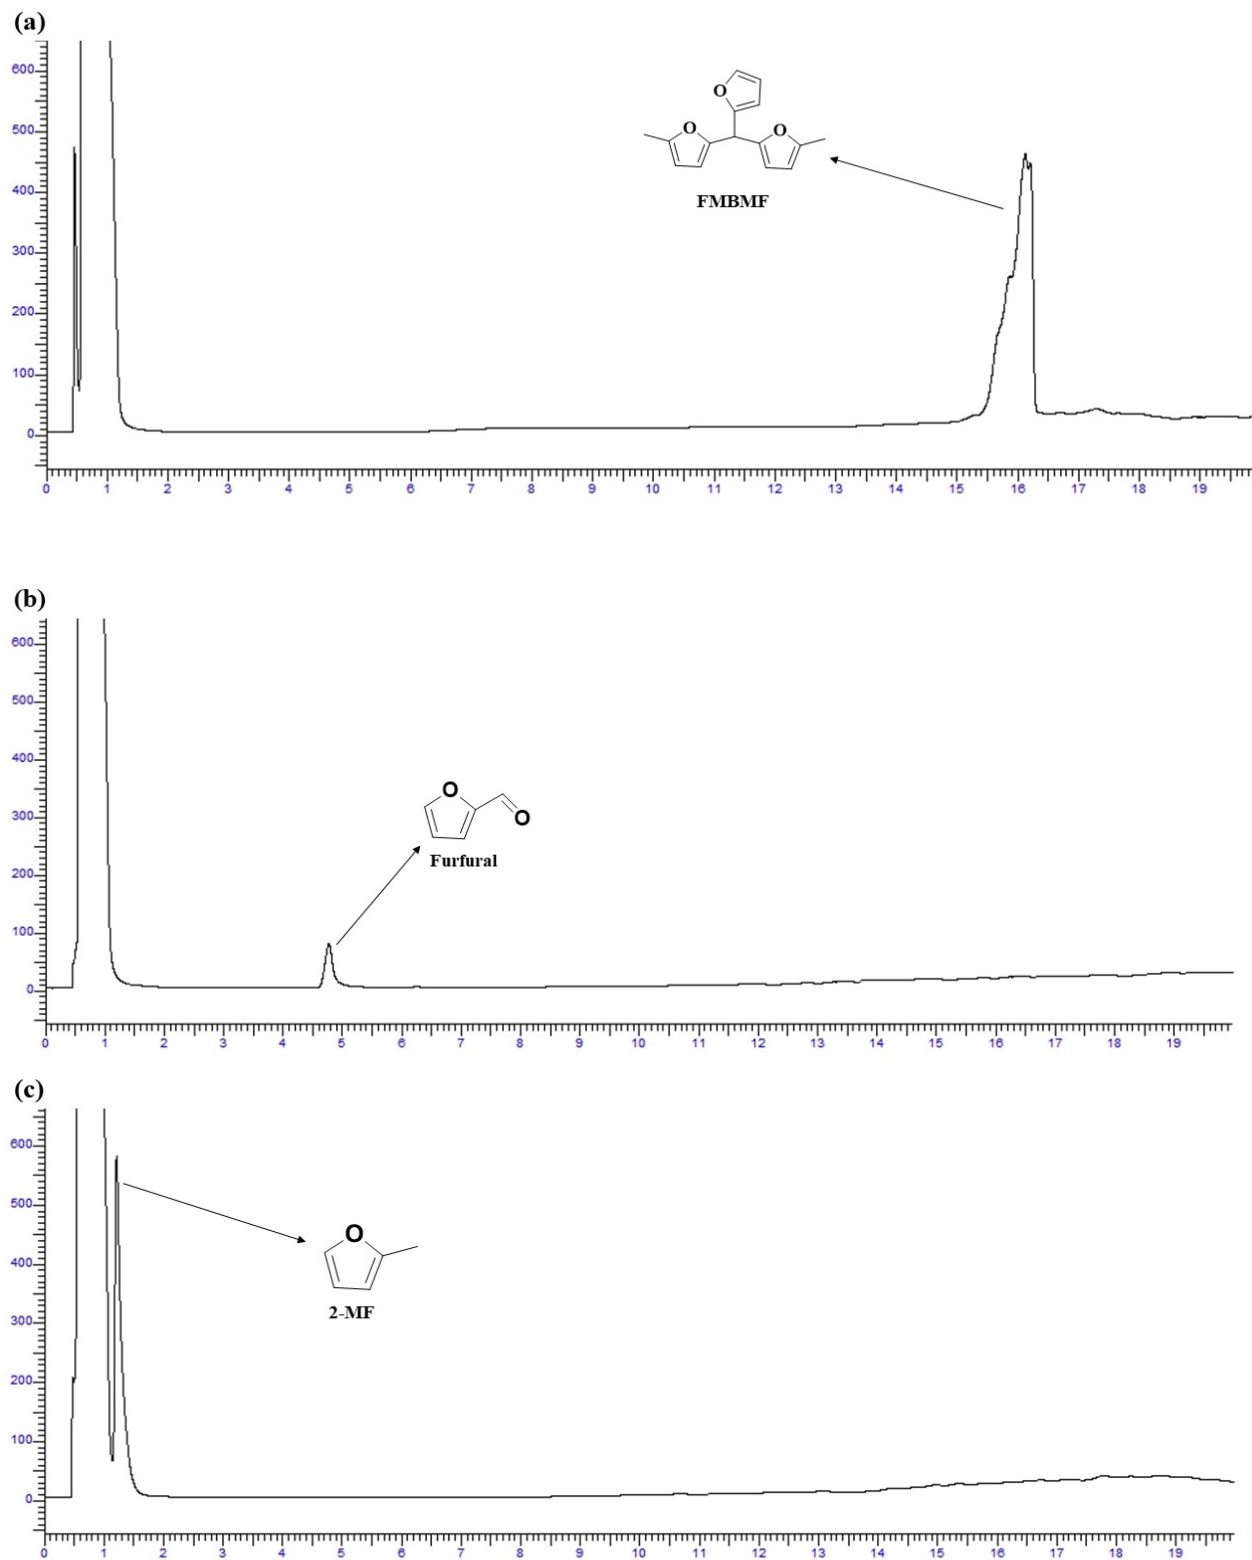

**Figure S7.** GC Chromatogram of (a) FMBMF , (b) Furfural , (c) 2 MF

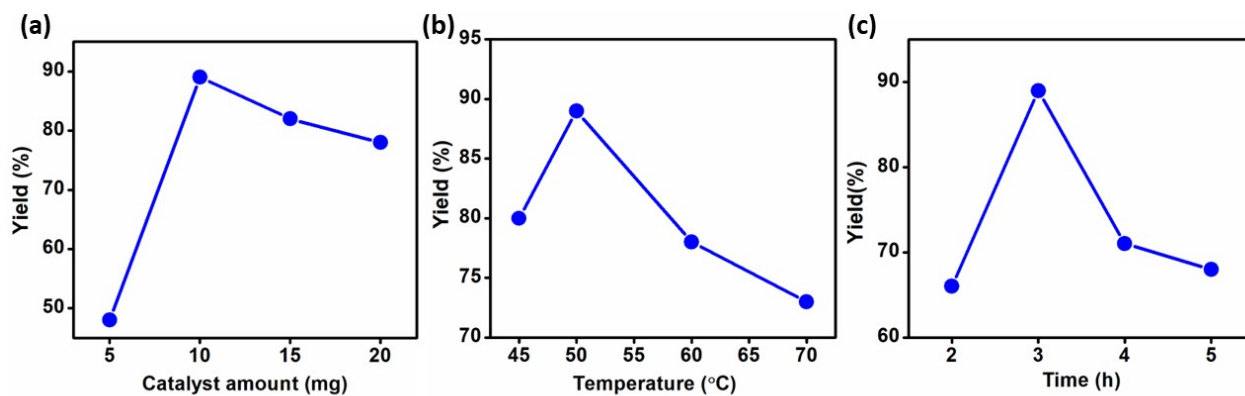

**Figure S8.** (a) Kinetic curve of formation of FMBMF by different amounts of catalyst. (b) The kinetic curve of FMBMF formation at different temperature rates. (c) The kinetic curve of FMBMF formation at different time intervals.

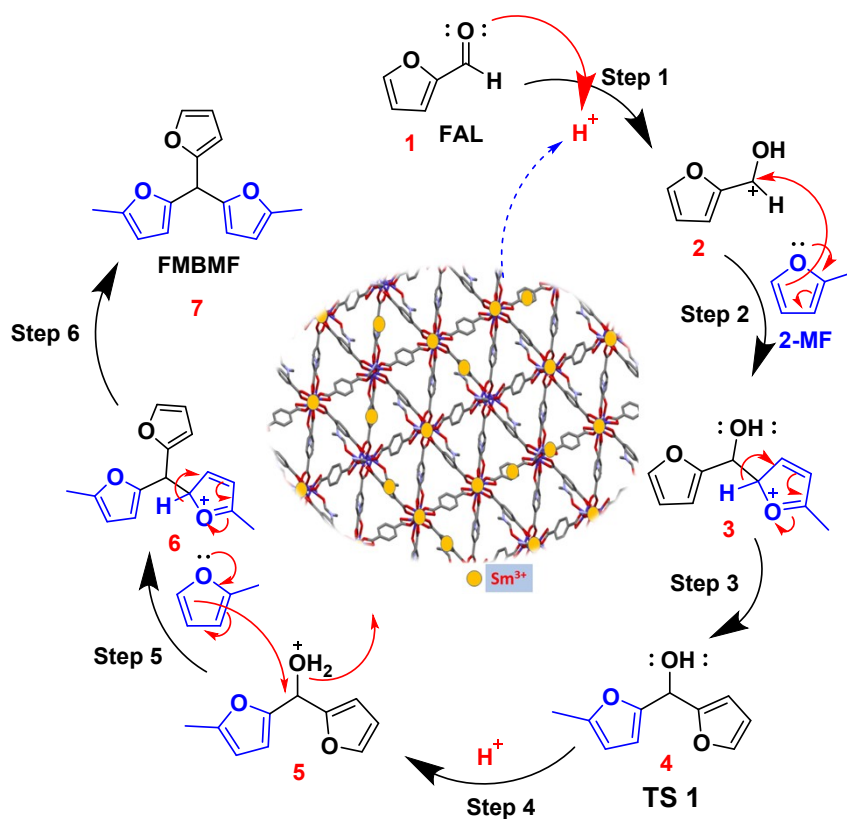

**Figure S9.** Proposed mechanism of catalytic conversion of FAL and 2-MF to FMBMF.



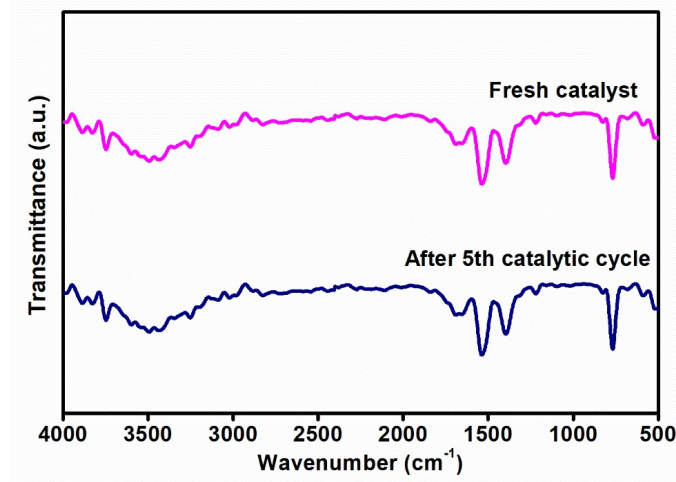

**Figure S10.** FTIR Spectra of Fresh Sm/Co-TTA MOF and after 5 th catalytic cycle.

**Table S1.** Crystal data and structure refinement for Co-TTA MOF.

| Parameter                                 | Co-TTA MOF                                                                      | Parameter                                        | Co-TTA MOF                                                    |
|-------------------------------------------|---------------------------------------------------------------------------------|--------------------------------------------------|---------------------------------------------------------------|
| Empirical formula                         | C <sub>18</sub> H <sub>19</sub> Co <sub>1.5</sub> N <sub>2</sub> O <sub>8</sub> | $\mu/\text{mm}^{-1}$                             | 1.237                                                         |
| Formula weight                            | 479.75                                                                          | F(000)                                           | 982.0                                                         |
| Temperature/K                             | 293(2)                                                                          | Crystal size/mm <sup>3</sup>                     | 0.3 × 0.1 × 0.1                                               |
| Crystal system                            | monoclinic                                                                      | Radiation                                        | MoK $\alpha$ ( $\lambda = 0.71073$ )                          |
| Space group                               | P2 <sub>1</sub> /n                                                              | 2 $\Theta$ range for data collection/ $^{\circ}$ | 5.388 to 56.064                                               |
| a/Å                                       | 14.7519(12)                                                                     | Index ranges                                     | -18 ≤ h ≤ 19, -11 ≤ k ≤ 12, -19 ≤ l ≤ 19                      |
| b/Å                                       | 9.6628(7)                                                                       | Reflections collected                            | 13904                                                         |
| c/Å                                       | 15.4954(12)                                                                     | Independent reflections                          | 4752 [R <sub>int</sub> = 0.0810, R <sub>sigma</sub> = 0.0873] |
| $\alpha/^{\circ}$                         | 90                                                                              | Data/restraints/parameters                       | 4752/76/271                                                   |
| $\beta/^{\circ}$                          | 106.904(3)                                                                      | Goodness-of-fit on F <sup>2</sup>                | 1.193                                                         |
| $\gamma/^{\circ}$                         | 90                                                                              | Final R indexes [I ≥ 2 $\sigma$ (I)]             | R1 = 0.1065, wR2 = 0.3073                                     |
| Volume/Å <sup>3</sup>                     | 2113.4(3)                                                                       | Final R indexes [all data]                       | R1 = 0.1510, wR2 = 0.3572                                     |
| Z                                         | 4                                                                               | Largest diff. peak/hole / e Å <sup>-3</sup>      | 2.04/-1.64                                                    |
| $\rho_{\text{calc}}/\text{g}/\text{cm}^3$ | 1.508                                                                           |                                                  |                                                               |

**Table S2.** Selected Bond length(A°) and Bond angle for Co-TTA MOF.

| <b>Bond</b>          | <b>Length(A°)</b> | <b>Bond</b>          | <b>Length(A°)</b> |
|----------------------|-------------------|----------------------|-------------------|
| Co2- O2              | 2.039(5)          | Co1- O1              | 1.995(6)          |
| Co2- O2 <sup>1</sup> | 2.039(5)          | Co1- O7 <sup>2</sup> | 2.005(6)          |
| Co2- O3              | 2.143(5)          | Co1- O4              | 2.264(6)          |
| Co2- O3 <sup>1</sup> | 2.143(5)          | Co1- O5              | 2.226(10)         |
| Co2- O8 <sup>2</sup> | 2.057(5)          | Co1- O6              | 2.007(9)          |
| Co1- O3              | 2.106(5)          | Co2- O8 <sup>3</sup> | 2.057(5)          |

| <b>Bond</b>                          | <b>Angle/°</b> | <b>Bond</b>                          | <b>Angle/°</b> | <b>Bond</b>             | <b>Angle/°</b> |
|--------------------------------------|----------------|--------------------------------------|----------------|-------------------------|----------------|
| O2-Co2-O2 <sup>1</sup>               | 180.0          | O8 <sup>2</sup> -Co2-O3 <sup>1</sup> | 88.9(2)        | O1-Co1-O5               | 84.1(4)        |
| O2-Co2-O3                            | 88.25(19)      | O8 <sup>3</sup> -Co2-O3 <sup>1</sup> | 91.1(2)        | O1-Co1-O6               | 103.9(4)       |
| O2-Co2-O3 <sup>1</sup>               | 91.75(19)      | O8 <sup>2</sup> -Co2-O3              | 91.1(2)        | O7 <sup>2</sup> -Co1-O3 | 102.6(2)       |
| O2 <sup>1</sup> -Co2-O3              | 91.75(19)      | O8 <sup>3</sup> -Co2-O3              | 88.9(2)        | O7 <sup>2</sup> -Co1-O4 | 94.7(3)        |
| O2 <sup>1</sup> -Co2-O3 <sup>1</sup> | 88.25(19)      | O8 <sup>2</sup> -Co2-O8 <sup>3</sup> | 180.0          | O7 <sup>2</sup> -Co1-O5 | 170.5(4)       |
| O2-Co2-O8 <sup>2</sup>               | 93.9(2)        | O3-Co1-O4                            | 59.6(2)        | O7 <sup>2</sup> -Co1-O6 | 89.4(4)        |
| O2 <sup>1</sup> -Co2-O8 <sup>3</sup> | 93.9(2)        | O3-Co1-O5                            | 83.8(3)        | C1-O2-Co2               | 140.5(5)       |
| O2 <sup>1</sup> -Co2-O8 <sup>2</sup> | 86.1(2)        | O1-Co1-O3                            | 96.6(2)        | Co1-O3-Co2              | 108.5(2)       |
| O2-Co2-O8 <sup>3</sup>               | 86.1(2)        | O1-Co1-O7 <sup>2</sup>               | 102.0(3)       | C2-O3-Co2               | 128.7(5)       |
| O3-Co2-O3 <sup>1</sup>               | 180.0(2)       | O6-Co1-O5                            | 81.9(5)        | C2-O3-Co1               | 94.1(5)        |
| O1-Co1-O4                            | 153.7(3)       | O5-Co1-O4                            | 82.4(4)        | C2-O3-Co1               | 94.1(5)        |

**Table S3.** Optimization Reactions for Co-TTA MOF.

| <b>S.No.</b> | <b>Catalyst<br/>Amount(mg)</b> | <b>Temperature<br/>(°C)</b> | <b>Time(h)</b> | <b>Yield (%)</b> |
|--------------|--------------------------------|-----------------------------|----------------|------------------|
| 1.           | 10                             | 50                          | 3              | 43               |
| 2.           | 15                             | 50                          | 3              | 39               |
| 3.           | 10                             | 40                          | 3              | 31               |
| 4.           | 10                             | 60                          | 3              | 44               |
| 5.           | 10                             | 50                          | 4              | 41               |
| 6.           | 10                             | 50                          | 5              | 36               |
